# Supplementary material for: Identification of Koala (Phascolarctos cinereus) Faecal Cortisol Metabolites Using Liquid Chromatography-Mass Spectrometry and Enzyme Immunoassays
Source: MDPI journal article supplement (doi:10.3390/metabo11060393), 2021-06-16
Supplement: s1 [file s1]

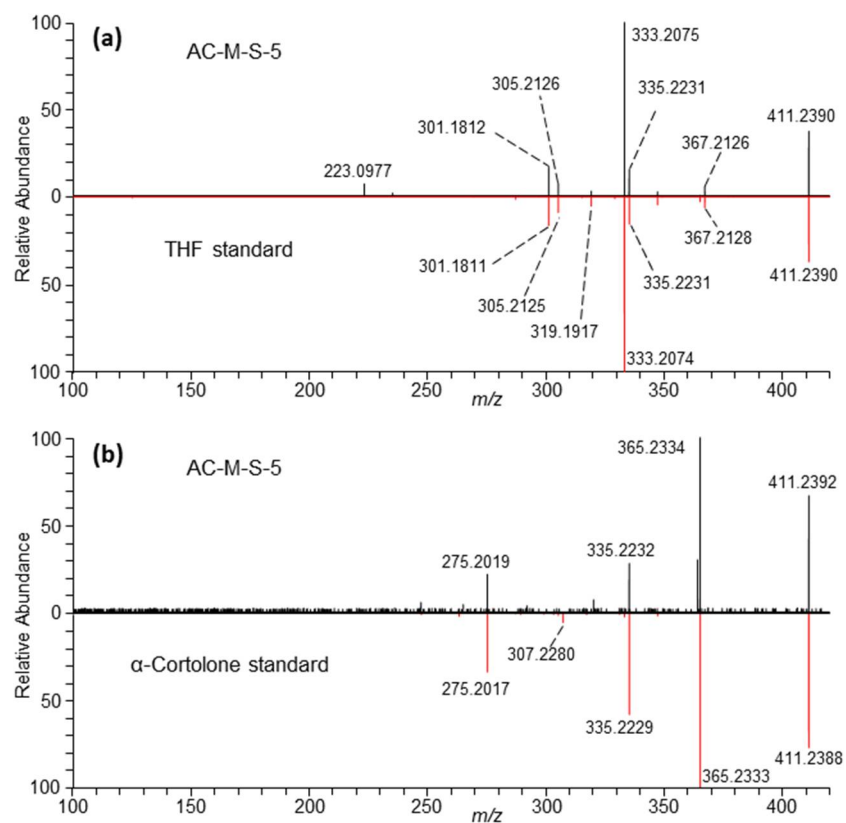

**Figure S1:** MS/MS spectra of parent ion 411.2388 in the RT region around 9.1 (a) and 8.3 (b) minutes for a representative AC sample extract (The male 5<sup>th</sup> AC sample) top and THF (a) and  $\alpha$ -Cortolone (b) standards below. The fragmentation spectra of the standards closely match those for the standards.

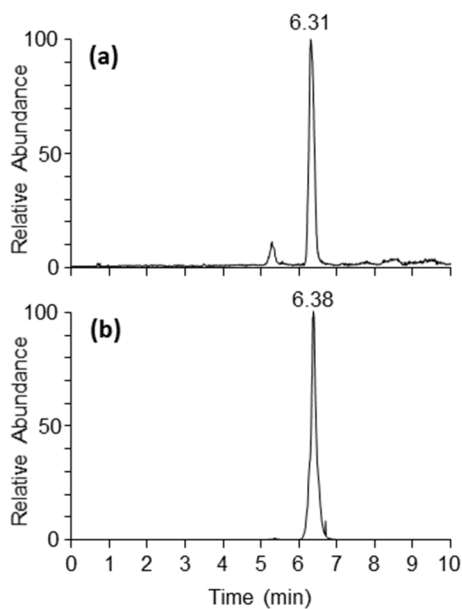

**Figure S2:** Extracted ion chromatograms (EIC) corresponding to deprotonated hydrocortisone succinate for the 13th AC female sample (a) and an authentic standard (b).

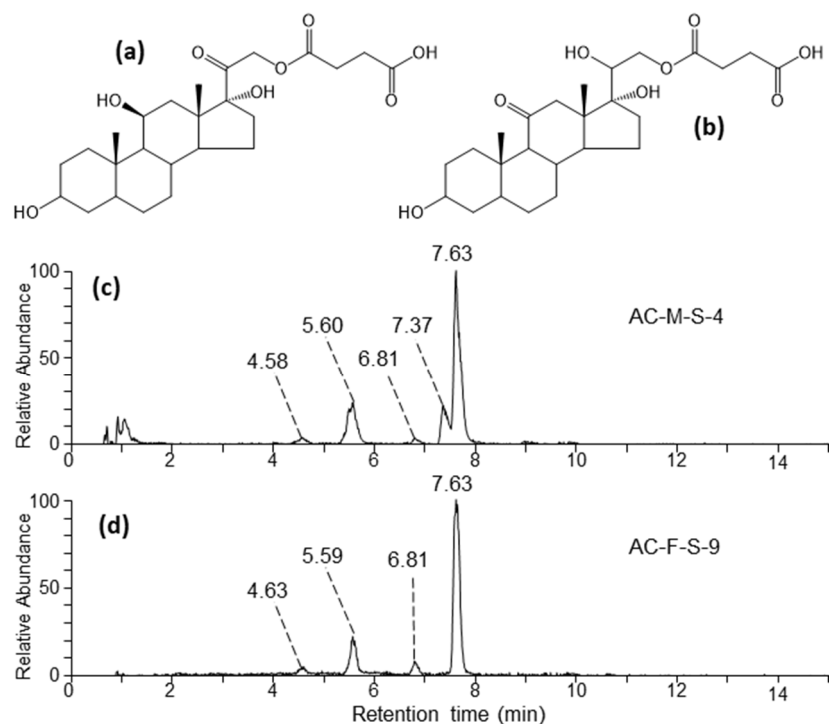

**Figure S3:** (a) and (b) show candidate structures consistent with the mass of feature 6 corresponding to succinate esters of THF and cortolone respectively. EIC corresponding to deprotonated feature 6 for the 4<sup>th</sup> AC sample from the male (c) and 9<sup>th</sup> AC sample from the female (d).

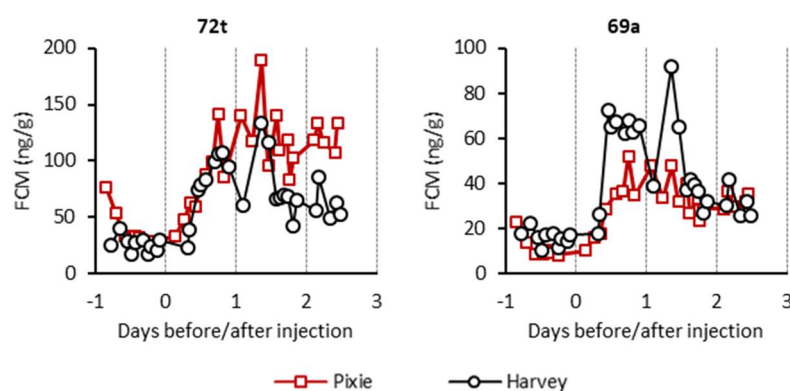

**Figure S4:** EIAs used for analyses of faecal extracts. (a) 72t and 69a EIA. Red lines represent Pixie and black Harvey.

**Table S1:** MRM conditions used on triple quadrupole mass spectrometer. Note that the same transitions were used for all the tetrahydrocortisol isomers.

| Analyte(s)                 | Transition    | Polarity | Collision Energy |
|----------------------------|---------------|----------|------------------|
| Cortisol                   | 362.2 → 121.0 | negative | 26               |
| Cortisol                   | 362.2 → 267.1 | negative | 18               |
| Cortisol                   | 362.2 → 309.1 | negative | 16               |
| Cortisol                   | 362.2 → 327.1 | negative | 14               |
| Tetrahydrocortisol isomers | 331.1 → 295.1 | positive | 12               |
| Tetrahydrocortisol isomers | 331.1 → 301.1 | positive | 8                |
| Tetrahydrocortisol isomers | 331.1 → 313.1 | positive | 10               |
| Tetrahydrocortisol isomers | 349.1 → 295.1 | positive | 14               |
| Tetrahydrocortisol isomers | 349.1 → 301.1 | positive | 12               |
| Tetrahydrocortisol isomers | 349.1 → 313.1 | positive | 12               |
| Tetrahydrocortisol isomers | 411.3 → 313.1 | negative | 18               |
| 11-oxoaetiocholanolone     | 287.1 → 229.1 | positive | 22               |
| 11-oxoaetiocholanolone     | 287.1 → 269.1 | positive | 18               |

**Table S2:** Details of the faecal sample collection.

|                                | Animal | Day | Date       | Time        | Number of pellets |
|--------------------------------|--------|-----|------------|-------------|-------------------|
| Before cortisol administration | Harvey | 1   | 25/09/2018 | 12:55-13:05 | 31                |
|                                |        | 1   | 25/09/2018 | 16:00-16:19 | 53                |
|                                |        | 1   | 25/09/2018 | 18:30-18:34 | 23                |
|                                |        | 1   | 25/09/2018 | 19:55-20:02 | 13                |
|                                |        | 1   | 25/09/2018 | 21:00-21:45 | 45                |
|                                |        | 1   | 25/09/2018 | 22:35-22:43 | 23                |
|                                |        | 1   | 25/09/2018 | 23:56       | 30                |
|                                |        | 1   | 26/09/2018 | 01:38-01:43 | 25                |
|                                |        | 1   | 26/09/2018 | 02:39-02:48 | 15                |
|                                |        | 1   | 26/09/2018 | 04:44-04:55 | 19                |
| After cortisol administration  | Harvey | 1   | 26/09/2018 | 05:25-05:35 | 22                |
|                                |        | 1   | 26/09/2018 | 14:59-15:04 | 20                |
|                                |        | 1   | 26/09/2018 | 15:30-15:40 | 26                |
|                                |        | 1   | 26/09/2018 | 18:25-18:37 | 19                |
|                                |        | 1   | 26/09/2018 | 19:20-19:30 | 10                |
|                                |        | 1   | 26/09/2018 | 21:13-21:26 | 32                |
|                                |        | 1   | 27/09/2018 | 00:07-00:26 | 47                |
|                                |        | 1   | 27/09/2018 | 01:27-02:30 | 32                |
|                                |        | 1   | 27/09/2018 | 3:04        | 9                 |
|                                |        | 1   | 27/09/2018 | 4:56        | 43                |
|                                |        | 2   | 27/09/2018 | 09:45-09:50 | 10                |
|                                |        | 2   | 27/09/2018 | 16:00-16:12 | 32                |
|                                |        | 2   | 27/09/2018 | 18:40-19:15 | 38                |
|                                |        | 2   | 27/09/2018 | 21:05-21:18 | 23                |
|                                |        | 2   | 27/09/2018 | 22:30-23:06 | 29                |
|                                |        | 2   | 28/09/2018 | 00:02-00:50 | 34                |
|                                |        | 2   | 28/09/2018 | 01:13-01:34 | 18                |
|                                |        | 2   | 28/09/2018 | 3:00        | 33                |
|                                |        | 2   | 28/09/2018 | 4:10-4:20   | 6                 |
|                                |        | 3   | 28/09/2018 | 10:36-10:45 | 24                |
|                                |        | 3   | 28/09/2018 | 11:43-12:00 | 30+               |
|                                |        | 3   | 28/09/2018 | 15:35-16:00 | 30                |
|                                |        | 3   | 28/09/2018 | 17:35-17:52 | 37                |
|                                |        | 3   | 28/09/2018 | 19:05-19:15 | 10                |

Table S3 continues on the following page

Table S2 continued

|                                   | Animal | Day | Date       | Time        | Number of pellets |
|-----------------------------------|--------|-----|------------|-------------|-------------------|
| Before cortisol<br>administration | Pixie  | 1   | 25/09/2018 | 11:06-11:25 | 25                |
|                                   | Pixie  | 1   | 25/09/2018 | 14:21-14:30 | 22                |
|                                   | Pixie  | 1   | 25/09/2018 | 17:30-17:34 | 24                |
|                                   | Pixie  | 1   | 25/09/2018 | 20:10-20:15 | 10                |
|                                   | Pixie  | 1   | 25/09/2018 | 21:05-21:30 | 12                |
|                                   | Pixie  | 1   | 25/09/2018 | 22:22-22:29 | 8                 |
|                                   | Pixie  | 1   | 26/09/2018 | 01:22-01:28 | 13                |
|                                   | Pixie  | 1   | 26/09/2018 | 03:07-03:10 | 3                 |
|                                   | Pixie  | 1   | 26/09/2018 | 04:30-04:32 | 2                 |
| After cortisol<br>administration  | Pixie  | 1   | 26/09/2018 | 10:36-10:42 | 23                |
|                                   | Pixie  | 1   | 26/09/2018 | 13:54-14:05 | 23                |
|                                   | Pixie  | 1   | 26/09/2018 | 15:52-16:09 | 16                |
|                                   | Pixie  | 1   | 26/09/2018 | 17:27-18:13 | 17                |
|                                   | Pixie  | 1   | 26/09/2018 | 18:25-18:45 | 3                 |
|                                   | Pixie  | 1   | 26/09/2018 | 19:06-19:39 | 7                 |
|                                   | Pixie  | 1   | 26/09/2018 | 20:55       | 9                 |
|                                   | Pixie  | 1   | 26/09/2018 | 23:29-23:35 | 6                 |
|                                   | Pixie  | 1   | 27/09/2018 | 01:27-01:40 | 9                 |
|                                   | Pixie  | 1   | 27/09/2018 | 3:16        | 13                |
|                                   | Pixie  | 1   | 27/09/2018 | 5:14        | 11                |
|                                   | Pixie  | 2   | 27/09/2018 | 09:00-09:15 | 29                |
|                                   | Pixie  | 2   | 27/09/2018 | 12:57-13:10 | 33                |
|                                   | Pixie  | 2   | 27/09/2018 | unknown     | drier pellets     |
|                                   | Pixie  | 2   | 27/09/2018 | 18:22-19:15 | 15                |
|                                   | Pixie  | 2   | 27/09/2018 | 21:15-21:28 | 18                |
|                                   | Pixie  | 2   | 28/09/2018 | 22:08-22:23 | 27                |
|                                   | Pixie  | 2   | 28/09/2018 | 01:02-00:35 | 23                |
|                                   | Pixie  | 2   | 28/09/2018 | 01:39-02:00 | 21                |
|                                   | Pixie  | 2   | 28/09/2018 | 3:00        | 6                 |
|                                   | Pixie  | 3   | 28/09/2018 | 9:50-10:15  | 38                |
|                                   | Pixie  | 3   | 28/09/2018 | 11:10-11:20 | 23                |
|                                   | Pixie  | 3   | 28/09/2018 | 13:15-13:20 | 6                 |
|                                   | Pixie  | 3   | 28/09/2018 | 17:00-17:15 | 37                |
|                                   | Pixie  | 3   | 28/09/2018 | 17:58-18:06 | 8                 |
